# Supplementary material
Source: PubMed Central journal article supplement (PMC3634698)
Supplement: supp_tpc.112.107888_tpc107888Supplemental.pdf [file supp_tpc.112.107888_tpc107888Supplemental.pdf]

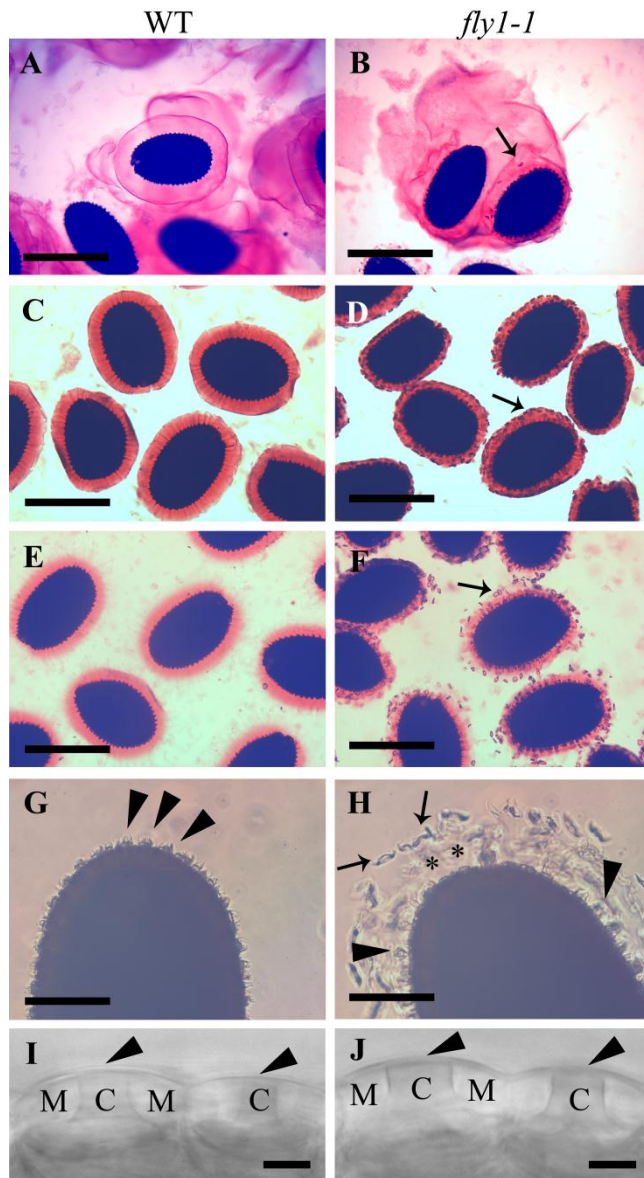

**Supplemental Figure 1.** Analysis of *fly1-1* Mucilage Extrusion and Primary Wall Attachment.

(A) and (B) Mature seeds hydrated in RR, without mechanical agitation. Both wild type (WT) and *fly1-1* release large amounts of non-adherent mucilage.

(C) and (D) Mature seeds shaken directly in RR. The *fly1-1* seeds display discs and a smaller mucilage capsule than WT.

(E) and (F) Mature seeds shaken in water for 24 h and then stained with RR. The inner, adherent mucilage layer and the *fly1-1* discs remain attached to seeds.

(G) and (H) Phase contrast micrographs of seeds shaken in water. Unlike *fly1-1*, all WT seed coat epidermal cells have primary cell walls attached to their columellae (arrowheads). The *fly1-1* seeds display discs (arrows) and loss of primary wall attachment (asterisks).

(I) and (J) Transmitted light images of live seed coat epidermal cells at 12 DPA. Both WT and *fly1-1* display primary cell walls (arrowheads) in close association with the columellae (C) during development. M, mucilage pockets.

Bars = 500  $\mu\text{m}$  in (A) to (F), 150  $\mu\text{m}$  in (G) and (H), and 10  $\mu\text{m}$  in (I) and (J).

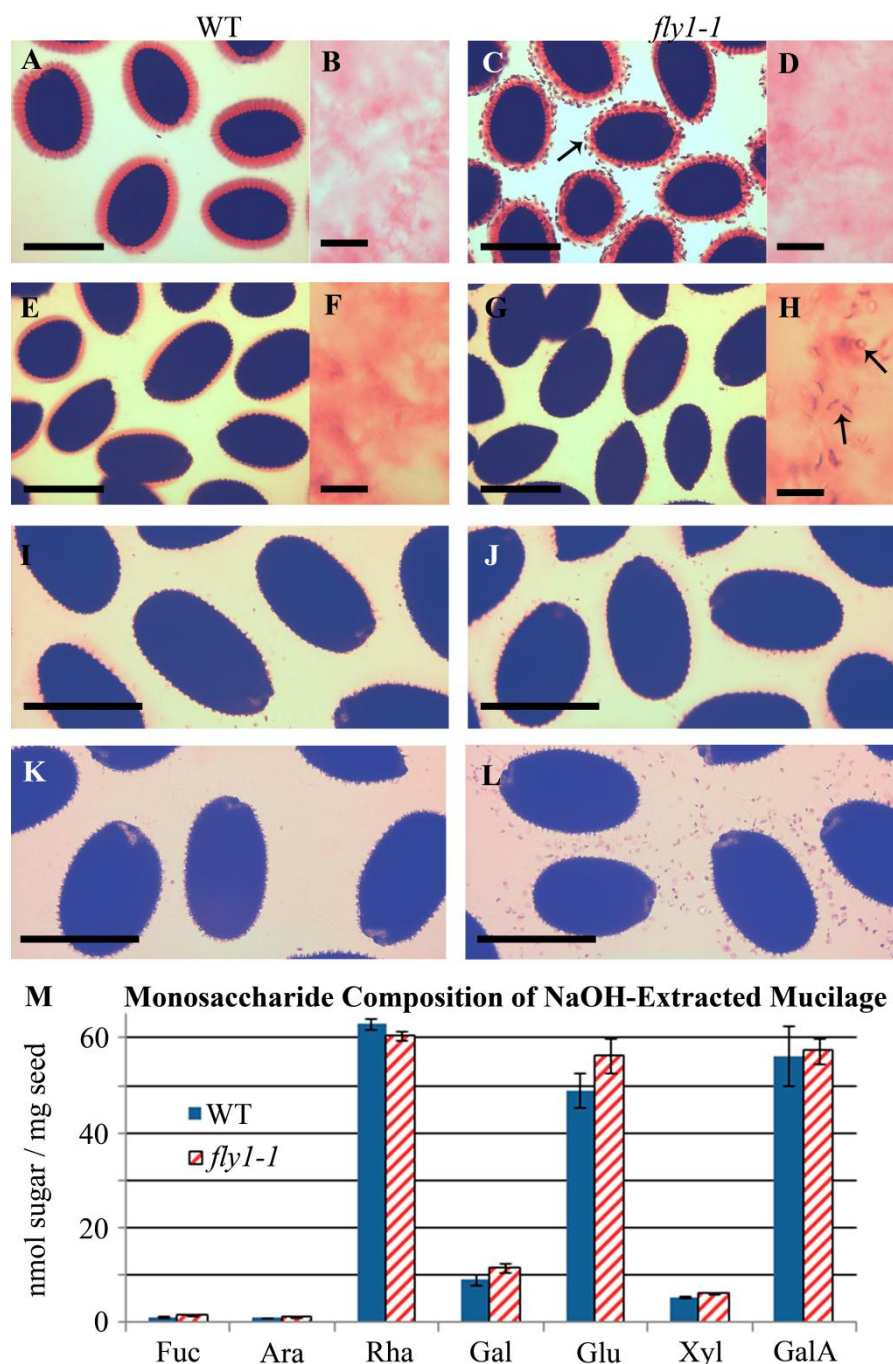

**Supplemental Figure 2.** Mucilage Extractions and Total Monosaccharide Composition.

(A) to (L) RR-staining of mucilage extractions for biochemical analysis. For sequential water extractions, seeds were gently shaken for 1 h (A) and (C), or vortexed for an additional 2 h (E) and (G). RR-stained extracted mucilage is shown in (B), (D), (F) and (H). Discs (arrows) are removed from *fly1-1* seeds only after vigorous shaking.

(I) and (J) For DM analysis, seeds vortexed in 50 mM EDTA pH 8 for 1 h. (K) and (L) Seeds vortexed in 0.2 NaOH for 1 h to remove all mucilage.

(M) Monosaccharide levels in wild type (WT) and *fly1-1* mucilage extracted from (K) and (L) respectively. Values are the mean  $\pm$  SE of four samples. Results were verified using two additional biological replicates. Bars = 100  $\mu$ m in (B), (D), (F) and (H), and 500  $\mu$ m in the other panels.

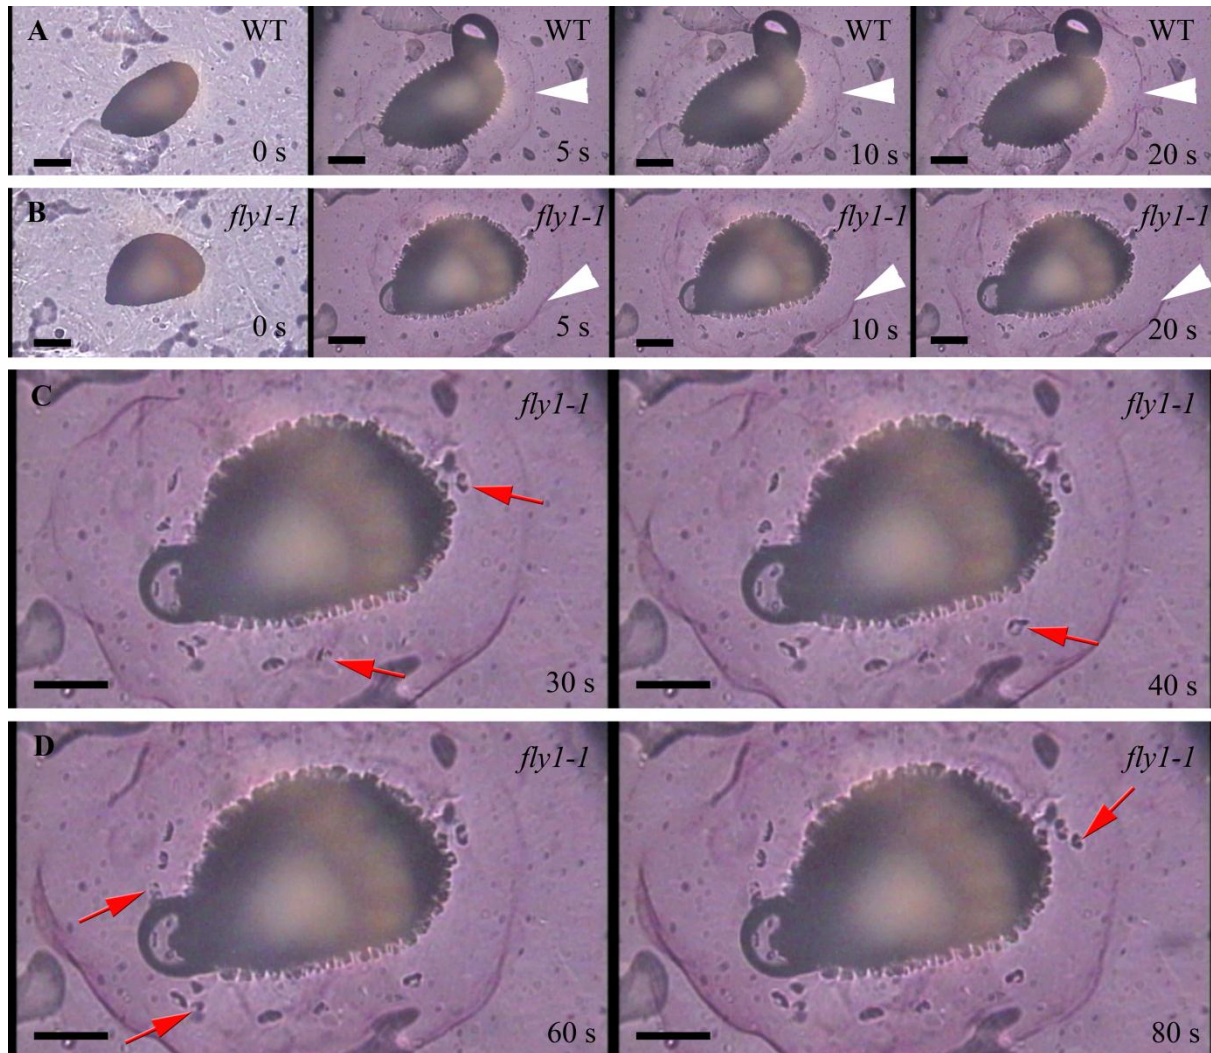

**Supplemental Figure 3.** Time Course Analysis of Mucilage Release From Seeds Upon Hydration.

(A) Wild type (WT) seed releases a large mucilage halo (arrowheads) within 10 s of hydration in RR. (B) to (D) *fly1-1* seed releases an equally large mucilage halo (arrowheads) within 10 s, but discs continue to be released after more than 60 s (arrows). Bars = 150  $\mu$ m.

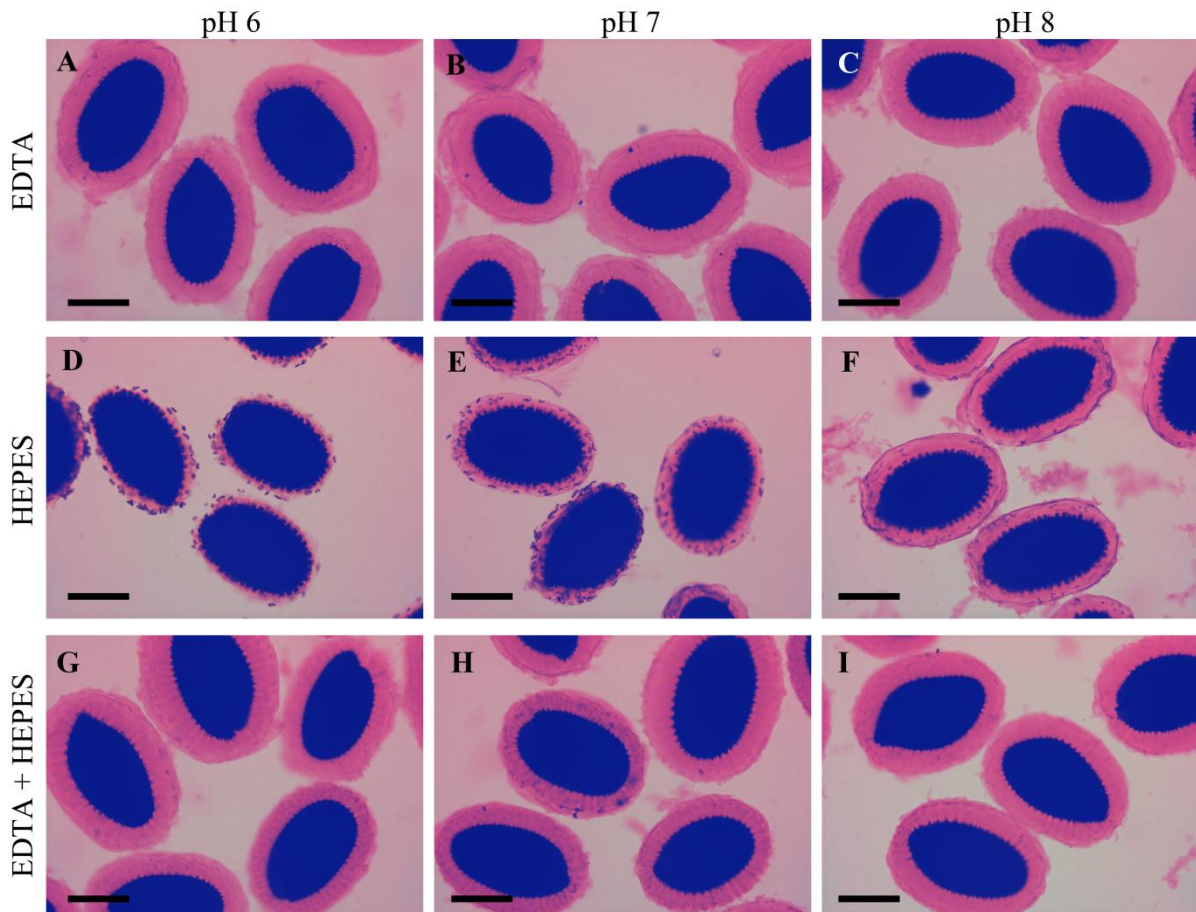

**Supplemental Figure 4.** Analysis of the Effect of Buffer pH on *fly1-1* Mucilage Defects.

(A) to (I) *fly1-1* seeds were shaken in 50 mM EDTA, 50 mM HEPES or both for 1 h before being rinsed and stained with RR. Unlike EDTA, HEPES does not chelate  $\text{Ca}^{2+}$  ions. EDTA pH 6 and 7 treatments (A) and (B) resemble the EDTA pH 8 treatment, which fully rescues the *fly1-1* mucilage defects (C). HEPES partially rescues the defects at pH 8 (F) but not at pH 6 (D). HEPES pH 7 shows an intermediate phenotype (E). The EDTA + HEPES treatments (G) to (I) phenocopy the EDTA treatments (A) to (C). Bars = 150  $\mu\text{m}$ .

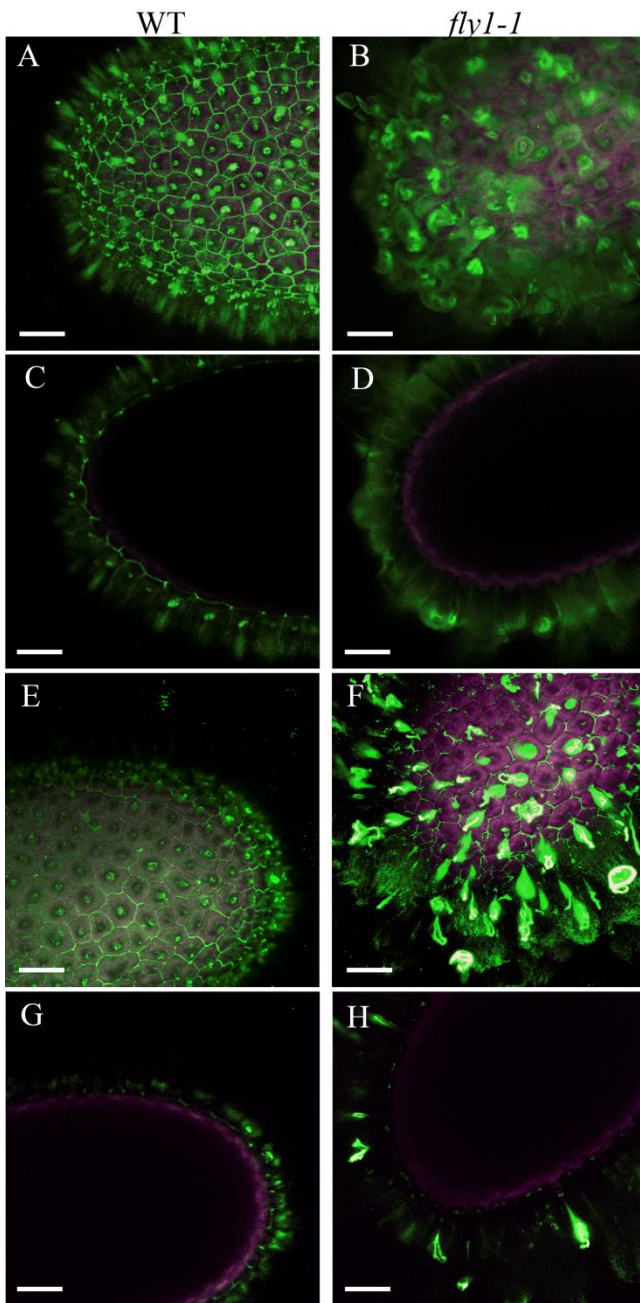

**Supplemental Figure 5.** Immunolabeling of Partially Methylesterified HG in Seeds.

(A) to (D) JIM5 and (E) to (H) JIM7 antibody signals are shown in green, and intrinsic seed fluorescence in magenta. (A), (B), (E) and (F) Maximum intensity signals from multiple optical slices. (C), (D), (G) and (H) represent single optical sections through the middle of seeds. JIM5 binds to low DM (up to 40%) HG (VandenBosch et al., 1989), and JIM7 labels high DM (35 to 81%) HG (Knox et al., 1990). The mucilage of *fly1-1* displays increased JIM5 and JIM7 immunofluorescence compared to wild type (WT). Bars = 50  $\mu$ m.

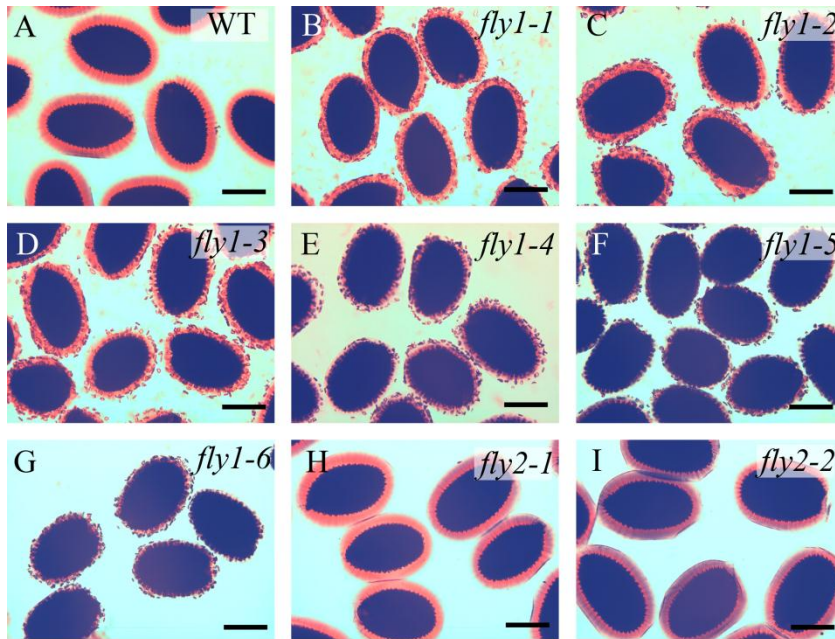

**Supplemental Figure 6.** Analysis of *fly1* and *fly2* Mucilage Extrusion.

(A) to (I) Seeds were shaken in water for 2 h and stained with RR. All *fly1* mutants have discs at the edge of the extruded mucilage. Wild type (WT) and *fly2* are indistinguishable. Bars = 300 μm.

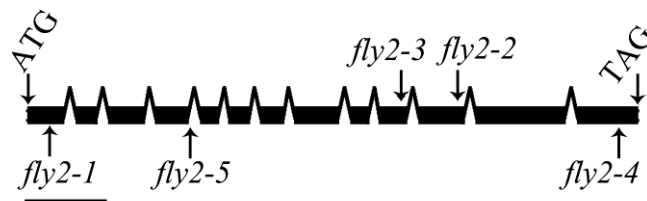

**Supplemental Figure 7.** *FLY2* Gene Structure and Mutations.

T-DNA insertions (*fly2-1* to *fly2-5*) are indicated with arrows. Boxes and connecting lines represent exons and introns. Bar = 300 amino acids.

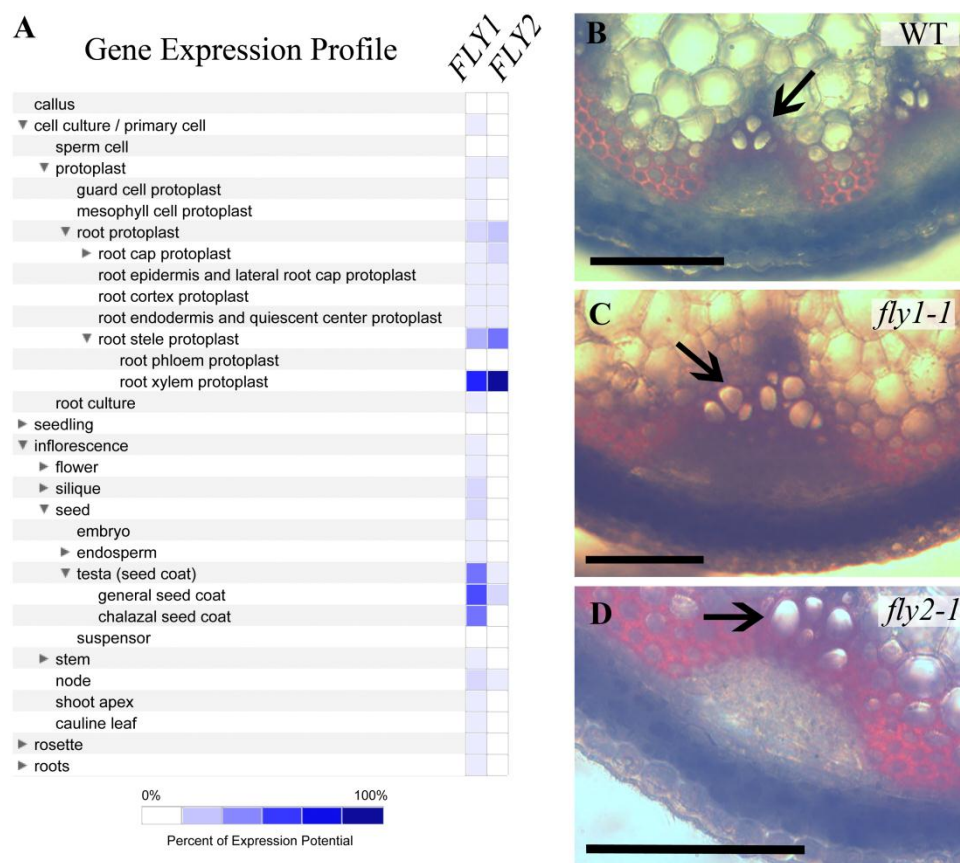

**Supplemental Figure 8.** *FLY1* and *FLY2* May Be Involved in Xylem Development.

(A) *FLY1* and *FLY2* are expressed highest in xylem cells. Relative transcript levels across Arabidopsis tissues and cell types are shown using a GENEVESTIGATOR heat map (Hruz et al., 2008). Values are normalized to the maximum expression level (darkest blue color) recorded for each gene. *FLY1*, unlike *FLY2*, also shows strong expression in the seed coat.

(B) to (D) Wild type (WT), *fly1-1*, and *fly2-1* display similar xylem cell morphology. Hand sections from the base of stems were stained with phloroglucinol-HCl. Arrows indicate xylem cells. Bars = 100 μm.

```

FLY1 504 CVICMTAIDL-----RQHTS--DCMVTPCEHFFHSGCLQRWMDIKMECPTCRRSLPP 561
FLY2 501 CVICMTTIDL-----RHRIN--DCMVTPCEHIFHSGCLQRWMDIKMECPTCRRPLPP 558
TUL1 698 CAICMSDVPIYIEEIPETHKVDQHSYMVTPCNHVFHTSCLLENWMNYKLCPCVCRSPLPP 757
* .***: : : : : . . *****:*.***:***:***:***:***:***:*** .***
    
```

**Supplemental Figure 9.** Alignment of the RING-H2 domains of *FLY1*, *FLY2* and *TUL1*.

Shading indicates the eight conserved Cys (C) and His (H) amino acids that define the RING-H2 domain (Stone et al., 2005). Fully conserved residues are indicated by an asterisk. A colon denotes conservation between groups with strongly similar properties, while a period indicates groups with weakly similar properties.

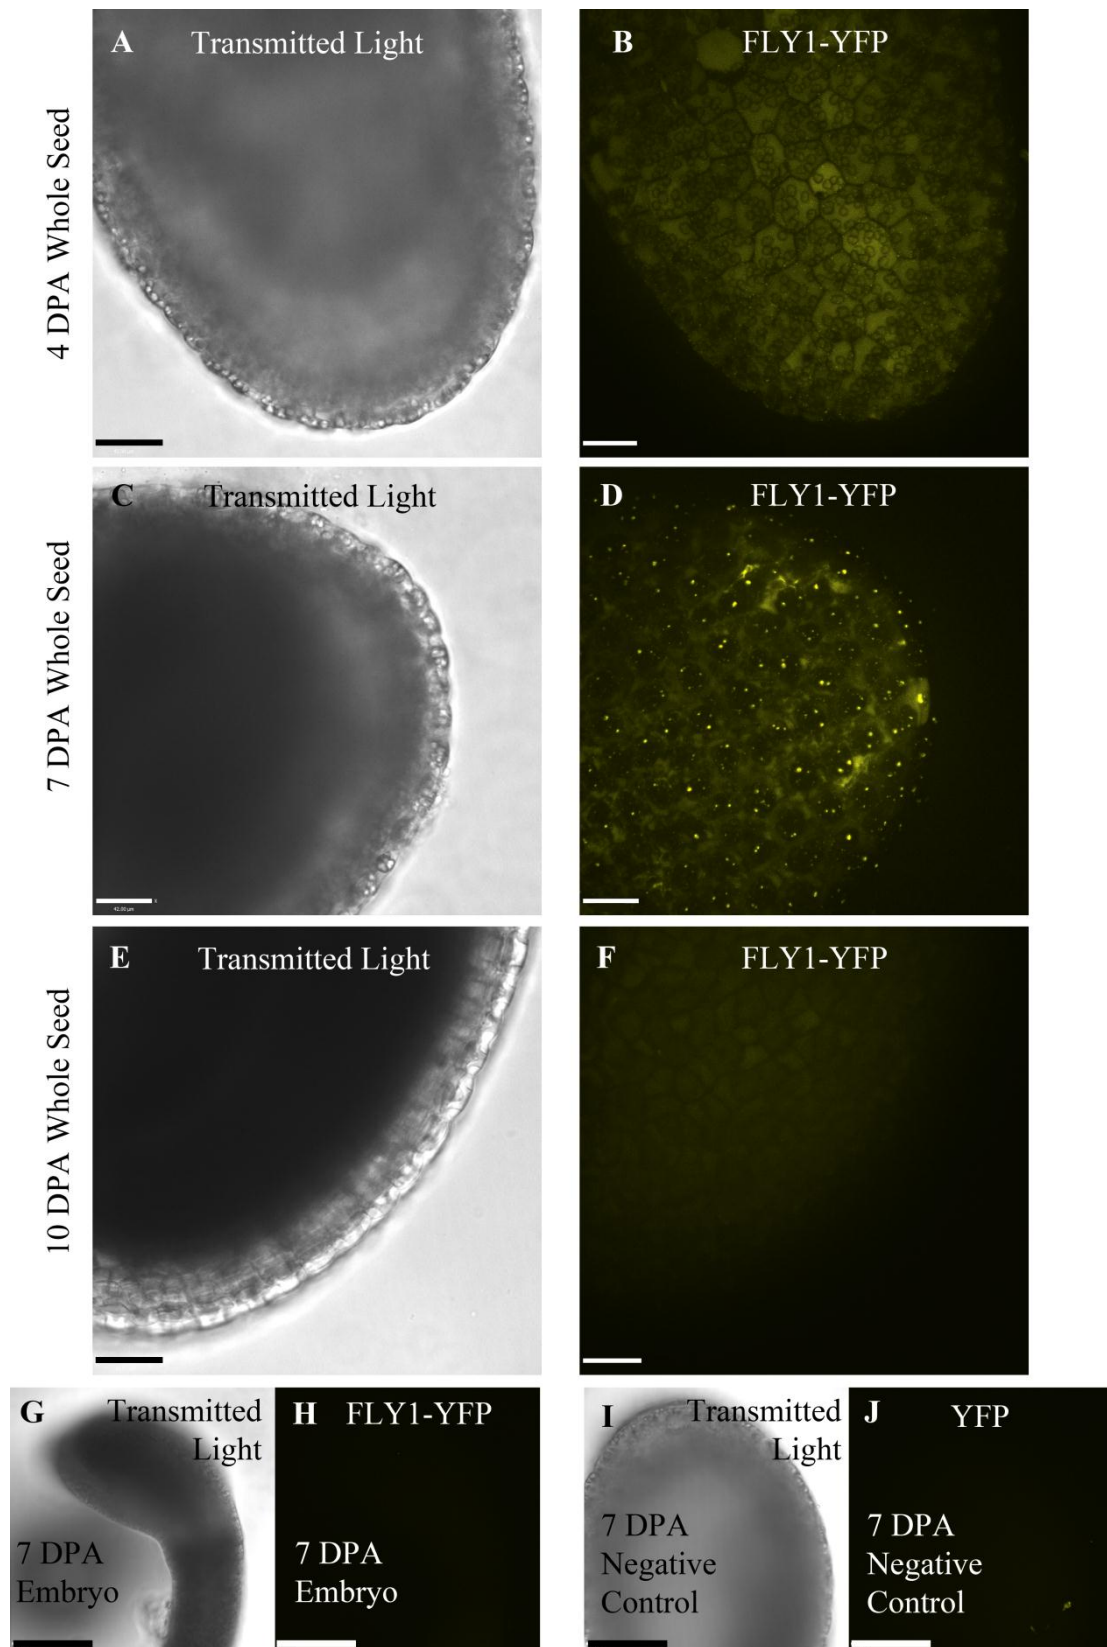

**Supplemental Figure 10.** Analysis of *FLY1<sub>pro</sub>:FLY1-YFP* expression in developing seeds.

(A) to (J) Light micrographs of developing seed tissues, left of the corresponding YFP signals (maximum intensity signals from multiple stacks).

(A) to (H) *fly1-1* seeds rescued with the *FLY1<sub>pro</sub>:FLY1-YFP* transgene show the highest FLY1-YFP expression in the seed coat epidermis at 7 DPA (D), but not in the embryo (H).

(J) 7 DPA *fly1-1* seeds without the *FLY1<sub>pro</sub>:FLY1-YFP* transgene show no YFP signal. Bars = 50  $\mu$ m in (A) to (F), 25  $\mu$ m in (G) to (J).



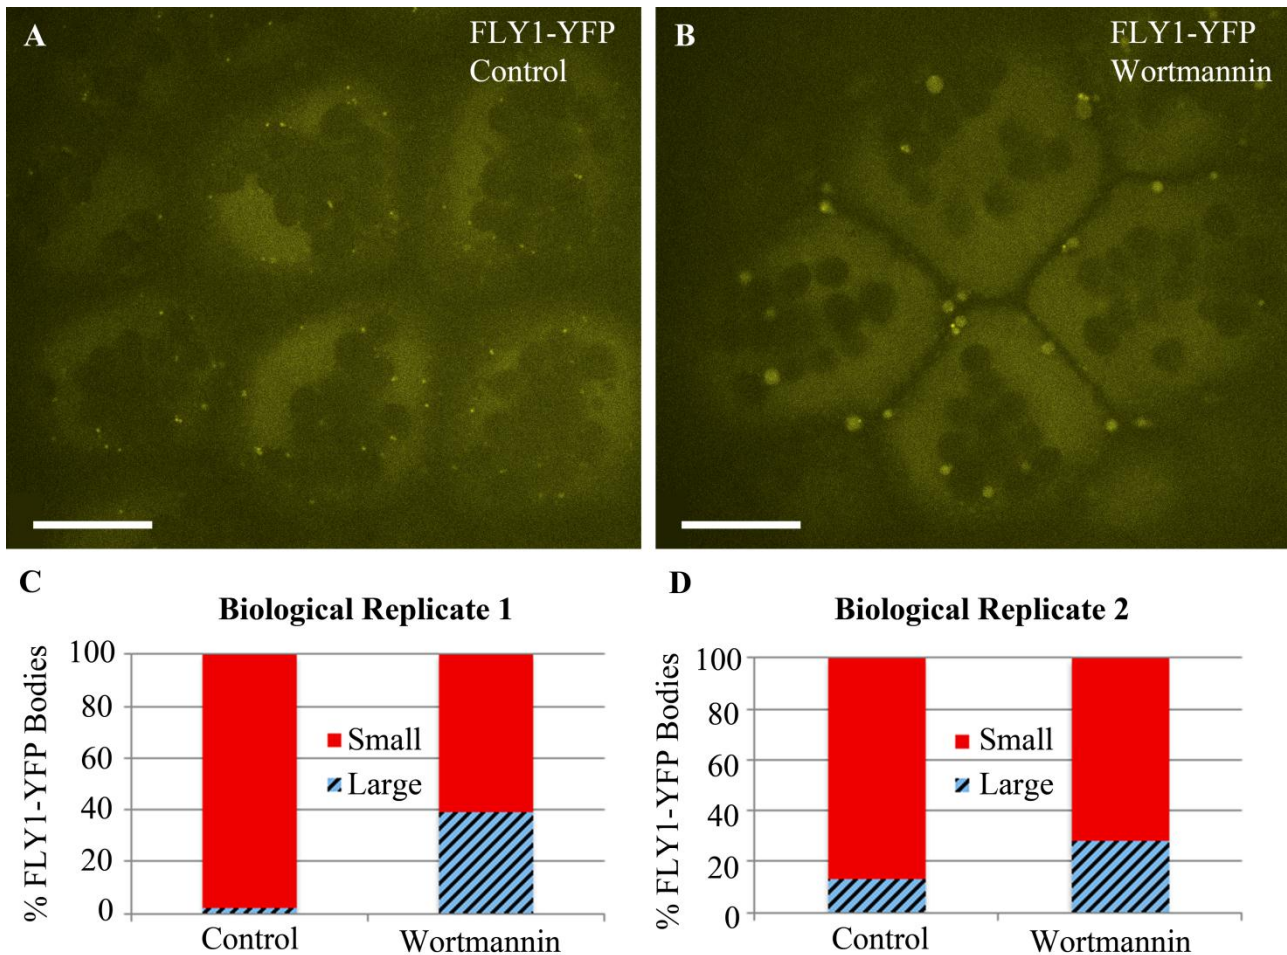

**Supplemental Figure 11.** Wortmannin Induces Fusions of FLY1-YFP punctae.

(A) and (B) *FLY1<sub>pro</sub>:FLY1-YFP* seeds excised from the same 7 DPA silique. (A) Control seed displays many small punctae. (B) Seed treated with 20  $\mu$ M wortmannin for 2 h displays many large bodies. Bars = 20  $\mu$ m.

(C) and (D) Wortmannin induced the fusion of small FLY1-YFP punctae (0.1  $\mu$ m<sup>2</sup> to 1.5  $\mu$ m<sup>2</sup>), thereby increasing the ratio of large bodies (2.5  $\mu$ m<sup>2</sup> to 8  $\mu$ m<sup>2</sup>) to punctae. Approximately 200 punctae/bodies were counted in each of the two biological replicates.

**Supplemental Table 1.** Gene-Specific Primers Used for T-DNA Genotyping and RT-PCR Analysis.

| <b>Locus</b>  | <b>Left Primer (5' to 3')</b> | <b>Right Primer (5' to 3')</b> |
|---------------|-------------------------------|--------------------------------|
| <i>fly1-2</i> | CGCAAGTTCAGATGCTAATGC         | AAAAAGGAACCGACAAACCT<br>G      |
| <i>fly1-3</i> | AGGCACAAATAAGCATCCATG         | ATGAACAAAATGTGGGTGGT<br>G      |
| <i>fly1-4</i> | TCTGCTAATGGCTTGTTTGATG        | ACGGGTGCTTTCCATATAGC           |
| <i>fly1-5</i> | TTTTCACTAGAAGCCACACGG         | CTTGCAGTGGCTCTTTGGTAG          |
| <i>fly1-6</i> | GCACTCAAGATTCAGTGCAGG         | ATGACGGAGATTGTTTTTCCC          |
| <i>fly2-1</i> | AACTGCACCCTGTTACATTC          | ACTCCGACATTCCAAGTTTCC          |
| <i>fly2-2</i> | CGATTCCTAAGGAACCAAAGG         | TTCTTGTATACAAGGGTGCCG          |
| <i>FLY1</i>   | TGTAGAGCCCAACAAGGTTTG         | GATCAATAGCGGTCATGCAG           |
| <i>FLY2</i>   | CAAAAAGAAAAGGTGGAGCAG         | AATTTTTGTTGGACTTGTCAC          |
| <i>GAPC</i>   | GATTCGGAAGAATTGGTCGTTT        | CTTCAAGTGAGCTGCAGCCTT          |
